# Supplementary material
Source: MDPI journal article supplement (https://www.mdpi.com/2414-4088/7/11/107)
Supplement: s1 [file s1]

Archive with 1 entries (1 files):
- mti-2697293-supplementary.pdf
