# Supplementary material
Source: MDPI journal article supplement (https://www.mdpi.com/2414-4088/7/11/107)
Supplement: s1 [file s1 › mti-2697293-supplementary.pdf]

**Table S1.** All Items of the expert survey.

| Questionnaire Structure | Instruction                                                                                 | Item                                                                                                                                                                                                                                                                                          | Scale                                                                  |
|-------------------------|---------------------------------------------------------------------------------------------|-----------------------------------------------------------------------------------------------------------------------------------------------------------------------------------------------------------------------------------------------------------------------------------------------|------------------------------------------------------------------------|
| Part A                  | Please put yourself in the shoes of a [Attendant Type X] and note (bullet points are ok)... | ... what an ideal [Attendant Type X] experience would look like? You may either have already experienced the situation, i.e., listened to or watched the user interaction with technology, yourself or made it up.                                                                            | free-text field                                                        |
|                         |                                                                                             | Please describe the user interaction as detailed as possible first and then specify what exactly makes the experience positive for you in the role of a [Attendant Type X].                                                                                                                   |                                                                        |
|                         |                                                                                             | ... what you in the role of a [Attendant Type X] could do, i.e., how to behave, in the situation you just described to (even better) satisfy or protect your interests/needs?                                                                                                                 | free-text field                                                        |
|                         |                                                                                             | ... which existing or fictive technological features and functions would allow or enable you as [Attendant Type X] to turn everyday observation situations, i.e., watching or listening to the technology interaction of a stranger in public space, into a positive experience for yourself? | free-text field                                                        |
| Part B                  | Please assess the following statements:<br>I find the card(s)...                            | easy to use                                                                                                                                                                                                                                                                                   | 5-point scale ranging from 1 (very poor) to 5 (very good)              |
|                         |                                                                                             | engaging                                                                                                                                                                                                                                                                                      |                                                                        |
|                         |                                                                                             | useful                                                                                                                                                                                                                                                                                        |                                                                        |
|                         |                                                                                             | valuable to my work                                                                                                                                                                                                                                                                           |                                                                        |
|                         |                                                                                             | supportive                                                                                                                                                                                                                                                                                    |                                                                        |
|                         |                                                                                             | other:                                                                                                                                                                                                                                                                                        |                                                                        |
|                         | Through the card(s)...                                                                      | the perspective of attendants in public technology interactions have become more tangible to me.                                                                                                                                                                                              | 5-point scale ranging from 1 (strongly disagree) to 5 (strongly agree) |
|                         |                                                                                             | something has become clear to me that has not been conscious to me before.                                                                                                                                                                                                                    |                                                                        |
|                         |                                                                                             | Did you feel like you were able to solve this task “successfully”?                                                                                                                                                                                                                            | 5-point scale ranging from 1 (not at all) to 5 (extremely)             |
|                         |                                                                                             | Is there any information missing?                                                                                                                                                                                                                                                             | free-text field                                                        |
|                         |                                                                                             | What about the card(s) was particularly helpful?                                                                                                                                                                                                                                              | free-text field                                                        |
|                         |                                                                                             | Which aspects of the cards did you dislike or find difficult?                                                                                                                                                                                                                                 | free-text field                                                        |

|                  |                                                                                                                                                                         |                                                                                                                                                                  |                                                           |
|------------------|-------------------------------------------------------------------------------------------------------------------------------------------------------------------------|------------------------------------------------------------------------------------------------------------------------------------------------------------------|-----------------------------------------------------------|
|                  |                                                                                                                                                                         | Do you have any suggestion on how the card set could be improved?                                                                                                | free-text field                                           |
|                  |                                                                                                                                                                         | Do you have any further ideas on potential use cases for the attendant card set or can you think of work situations where you might use the cards in the future? | free-text field                                           |
|                  | Furthermore, we are interested in your previous experience with research and design tools in general or cards in specific. Thus, please answer the following questions: | Have you ever worked with a card set/deck in research or design? If yes, please shortly describe which one and what your specific task looked like.              | free-text field                                           |
|                  |                                                                                                                                                                         | Do you know of a card set/deck or other design tool that helps to capture the social context in (public)technology interactions? If yes, which one?              | free-text field                                           |
| Demographic Data | Please answer the following demographic questions:                                                                                                                      | What is your age?                                                                                                                                                | free-text field                                           |
|                  |                                                                                                                                                                         | Gender: How do you identify?                                                                                                                                     | Man, Woman, Non-binary, Prefer to self-describe           |
|                  |                                                                                                                                                                         | What is your profession?                                                                                                                                         | free-text field                                           |
|                  | Please assess your expertise in the following areas:                                                                                                                    | Human-Computer Interaction<br>Psychology<br>Design<br>Research                                                                                                   | 5-point scale ranging from 1 (very poor) to 5 (very good) |
